# Supplementary material
Source: Royal Society of Chemistry journal article supplement (doi:10.1039/d6cs00220j)
Supplement: d6cs00220j1.pdf [file d6cs00220j1.pdf]

## Supplementary Information for

# **Precision Graphene Nanoribbons: Chemical Strategies for Tailored Edge, Backbone, and Electronic Structure**

Xinyu Chen<sup>1#</sup>, Yuanhuan Qiu<sup>1#</sup>, Jinjiang Zhang<sup>2</sup>, Xiangyang Liu<sup>1\*</sup>, Ji Ma<sup>3,5\*</sup>, Xu Wang<sup>1\*</sup>, Xinliang Feng<sup>2,4\*</sup>

<sup>1</sup>*College of Polymer Science and Engineering, State Key Laboratory of Advanced Polymer Materials, Sichuan University, Chengdu, 610065, P. R. China.*

<sup>2</sup>*Max Planck Institute of Microstructure Physics, Weinberg 2, Halle, 06120 Germany.*

<sup>3</sup>*Beijing National Laboratory for Molecular Sciences, CAS Key Laboratory of Organic Solids, Institute of Chemistry, Chinese Academy of Sciences, Beijing 100190, China.*

<sup>4</sup>*Center for Advancing Electronics Dresden and Faculty of Chemistry and Food Chemistry, Technische Universität Dresden, Dresden, Germany.*

<sup>5</sup>*College of Materials Science and Optoelectronic Technology, University of Chinese Academy of Sciences, Beijing, China.*

\*Corresponding author: Email: xinliang.feng@mpi-halle.mpg.de; wangxu@scu.edu.cn; maji26@iccas.ac.cn; lxy@scu.edu.cn

#These authors contributed equally: Xinyu Chen, Yuanhuan Qiu

Before discussing the charge carrier mobility of GNRs, we first provide a detailed introduction to the core principles, mobility extraction methods, and sample preparation of ultrafast optical pump-terahertz probe spectroscopy, so that readers can better understand the data discussion related to charge carrier mobility in this review.

### Basic principle and mobility extraction process

Ultrafast optical-pump terahertz-probe spectroscopy is a time-resolved terahertz technique, and its basic principle is as follows.<sup>1-5</sup> It should be noted that the charge carrier concentration of intrinsic GNRs is extremely low (intrinsic semiconductor). Without pump light excitation, the terahertz probe exhibits almost no absorption, making it impossible to directly measure the conductivity. Therefore, it is necessary to generate non-equilibrium carriers in GNRs through optical pumping, and then monitor their dynamic processes using a terahertz probe. It is precisely this time-resolved mode of optical-pump terahertz-probe spectroscopy that enables the acquisition of intrinsic carrier transport behavior in GNRs in a non-contact, electrode-free manner.<sup>6-10</sup>

The specific procedure is as follows: First, a femtosecond laser pulse (pump light) is irradiated onto the GNR sample to excite photogenerated carriers (electron-hole pairs). Subsequently, a broadband terahertz pulse (probe) with a time delay is transmitted through the sample. By measuring the changes in terahertz electric field transmission (or reflection) through the sample, the complex optical conductivity at different delay times after photoexcitation is obtained. By comparing the terahertz signal after photoexcitation with the original terahertz signal without excitation (or with a reference signal without the sample), the photoconductivity  $\sigma$  contributed by the photogenerated carriers can be extracted. On this basis, if the carrier concentration  $n$  is known (which can be estimated from the pump light intensity, absorption coefficient, and quantum efficiency), the carrier mobility  $\mu$  can be calculated using the relation  $\mu = \sigma/(n \cdot e)$ . A more rigorous approach is to fit the frequency-domain spectrum (real and imaginary parts) of the complex optical conductivity using the Drude-Smith model, with the formula as follows:

$$\Delta\sigma = \frac{\varepsilon_0 \omega_p^2 \tau}{1 - i\omega\tau} \left( 1 + \frac{c}{1 - i\omega\tau} \right)$$

Here,  $\varepsilon_0$  is the vacuum permittivity,  $\omega_p$  is the plasma frequency ( $\omega_p = \sqrt{ne^2/(\varepsilon_0 m^*)}$ ), determined by the charge carriers concentration ( $n$ ) and effective mass ( $m^*$ ), and  $\tau$  is the average carrier momentum scattering time. Fitting the frequency-domain spectrum of the complex optical conductivity using the Drude-Smith model allows simultaneous extraction of  $\tau$  and the backscattering parameter  $c$  (where  $c$  reflects the contributions from boundary scattering, edge scattering, and defect scattering). From these, the intrinsic mobility  $\mu = e\tau/m^*$  and the DC mobility  $\mu_{DC} = \mu(1 + c)$  can be further calculated.

### Sample preparation

Depending on the measurement requirements, GNR samples can be prepared in two forms. For solution-phase measurements, GNRs need to be well dispersed in a suitable solvent (such as toluene, 1,2,4-trichlorobenzene, etc.) to form a dilute solution, which is then placed in a quartz cuvette for measurement. In this case, the GNRs are isolated from each other without  $\pi$ - $\pi$  stacking, and the obtained mobility fully

reflects the intra-band transport within individual GNRs, i.e., the intrinsic mobility. For thin-film measurements, the GNR solution can be deposited onto a quartz or high-resistivity silicon substrate by spin coating or drop casting to form a film of a certain thickness. In the film, GNRs may partially stack with each other, so the measured mobility includes contributions from both intra-band and inter-band  $\pi$ - $\pi$  transport, with the latter increasing as the packing density of the film increases.

### Summary

In summary, ultrafast optical-pump terahertz-probe spectroscopy generates carriers through photoexcitation, uses terahertz pulses to probe their photoconductive response, and extracts carrier mobility through model fitting. It is an ideal tool for studying the intrinsic transport properties of GNRs and can be applied to samples in either solution or thin-film form.

### Reference

- 1 R. Ulbricht, E. Hendry, J. Shan, T. F. Heinz and M. Bonn, *Rev. Mod. Phys.*, 2011, **83**, 543–586.
- 2 E. Hendry, J. M. Schins, L. P. Candeias, L. D. A. Siebbeles and M. Bonn, *Phys. Rev. Lett.*, 2004, **92**, 196601.
- 3 E. Hendry, M. Koeberg, J. M. Schins, H. K. Nienhuys, V. Sundström, L. D. A. Siebbeles and M. Bonn, *Phys. Rev. B*, 2005, **71**, 125201.
- 4 F. Wang, J. Shan, M. A. Islam, I. P. Herman, M. Bonn and T. F. Heinz, *Nat. Mater.*, 2006, **5**, 861–864.
- 5 S. A. Jensen, R. Ulbricht, A. Narita, X. Feng, K. Müllen, T. Hertel, D. Turchinovich and M. Bonn, *Nano Lett.*, 2013, **13**, 5925–5930.
- 6 A. Narita, X. Feng, Y. Hernandez, S. A. Jensen, M. Bonn, H. Yang, I. A. Verzhbitskiy, C. Casiraghi, M. R. Hansen, A. H. R. Koch, G. Fytas, O. Ivasenko, B. Li, K. S. Mali, T. Balandina, S. Mahesh, S. De Feyter and K. Müllen, *Nature Chem*, 2014, **6**, 126–132.
- 7 X. Wang, J. Ma, W. Zheng, S. Osella, N. Arisnabarreta, J. Droste, G. Serra, O. Ivasenko, A. Lucotti, D. Beljonne, M. Bonn, X. Liu, M. R. Hansen, M. Tommasini, S. De Feyter, J. Liu, H. I. Wang and X. Feng, *J. Am. Chem. Soc.*, 2022, **144**, 228–235.
- 8 Q. Chen, A. Lodi, H. Zhang, A. Gee, H. I. Wang, F. Kong, M. Clarke, M. Edmondson, J. Hart, J. N. O’Shea, W. Stawski, J. Baugh, A. Narita, A. Saywell, M. Bonn, K. Müllen, L. Bogani and H. L. Anderson, *Nat. Chem.*, 2024, **16**, 1133–1140.
- 9 R. K. Dubey, M. Marongiu, S. Fu, G. Wen, M. Bonn, H. I. Wang, M. Melle-Franco and A. Mateo-Alonso, *Chem*, 2023, **9**, 2983–2996.
- 10 I. Ivanov, Y. Hu, S. Osella, U. Beser, H. I. Wang, D. Beljonne, A. Narita, K. Müllen, D. Turchinovich and M. Bonn, *J. Am. Chem. Soc.*, 2017, **139**, 7982–7988.

## Abbreviations

### 1. Abbreviations for Different GNRs

| <b>Abbreviation</b> | <b>Full Name</b>                                |
|---------------------|-------------------------------------------------|
| <b>GNR</b>          | Graphene Nanoribbon                             |
| <b>AGNR</b>         | Armchair-edged Graphene Nanoribbon              |
| <b>ZGNR</b>         | Zigzag-edged Graphene Nanoribbon                |
| <b>chGNR</b>        | Chiral-edged Graphene Nanoribbon                |
| <b>CGNR</b>         | Cove-edged Graphene Nanoribbon                  |
| <b>cGNR</b>         | Curved Graphene Nanoribbon                      |
| <b>cMGNR</b>        | Curved Multi-edged Graphene Nanoribbon          |
| <b>CcGNR</b>        | Cove-edged Chiral Graphene Nanoribbon           |
| <b>CZGNR</b>        | Cove-Zigzag Hybrid-edged Graphene Nanoribbon    |
| <b>FGNR</b>         | Fjord-edged Graphene Nanoribbon                 |
| <b>JGNR</b>         | Janus-type Graphene Nanoribbon                  |
| <b>PyGNR</b>        | Pyrene-based Curved Graphene Nanoribbon         |
| <b>Por-ZGNR</b>     | Porphyrin-extended Zigzag Graphene Nanoribbon   |
| <b>PGNR</b>         | Porphyrin-embedded Graphene Nanoribbon          |
| <b>wGNR</b>         | Wave-shaped Graphene Nanoribbon                 |
| <b>ANR</b>          | Azulene-based Non-benzenoid Graphene Nanoribbon |
| <b>pGNR</b>         | Porous Graphene Nanoribbon                      |
| <b>npGNR</b>        | Non-porous Graphene Nanoribbon                  |
| <b>NPG</b>          | Nanoporous Graphene                             |

|                           |                                                           |
|---------------------------|-----------------------------------------------------------|
| <b>BN-GNR</b>             | Boron-Nitrogen co-doped Graphene Nanoribbon               |
| <b>S-GNR</b>              | Sulfur-doped Graphene Nanoribbon                          |
| <b>N-AGNR</b>             | Nitrogen-doped Armchair Graphene Nanoribbon               |
| <b>N-ZGNR</b>             | Nitrogen-doped Zigzag Graphene Nanoribbon                 |
| <b>N<sub>2</sub>-cGNR</b> | Nitrogen-pair doped Cove-edged Graphene Nanoribbon        |
| <b>NBN-ZGNR</b>           | Nitrogen-Boron-Nitrogen doped Zigzag Graphene Nanoribbon  |
| <b>OBO-GNR</b>            | Oxygen-Boron-Oxygen doped Graphene Nanoribbon             |
| <b>GNR-H</b>              | Hydrogen-terminated Gulf-edged Graphene Nanoribbon        |
| <b>GNR-OMe</b>            | Methoxy-functionalized Gulf-edged Graphene Nanoribbon     |
| <b>GNR-COOH</b>           | Carboxyl-functionalized Graphene Nanoribbon               |
| <b>GNR-PEO</b>            | Poly(ethylene oxide)-grafted Graphene Nanoribbon          |
| <b>GNR-AHM</b>            | Anthracene-Hexadecylmaleimide-grafted Graphene Nanoribbon |
| <b>GNR-Por</b>            | Porphyrin-edge-functionalized Graphene Nanoribbon         |
| <b>GNR-NMI</b>            | Naphthalene Monoimide-functionalized Graphene Nanoribbon  |
| <b>GNR-PMI</b>            | Perylene Monoimide-functionalized Graphene Nanoribbon     |
| <b><i>p</i>T-GNR</b>      | <i>para</i> -Thiophene-edged Graphene Nanoribbon          |
| <b><i>o</i>T-GNR</b>      | <i>ortho</i> -Thiophene-edged Graphene Nanoribbon         |
| <b>K-chGNR</b>            | Ketone-functionalized Chiral Graphene Nanoribbon          |
| <b>P-chGNR</b>            | Pristine Chiral Graphene Nanoribbon                       |
| <b>CNS</b>                | Chiral Nanocarbon Structure                               |
| <b>N-CNS</b>              | Nitrogen-doped Chiral Nanocarbon Structure                |

|                |                                               |
|----------------|-----------------------------------------------|
| <b>L-PyGNR</b> | Linear Pyrene-based Graphene Nanoribbon       |
| <b>H-PyGNR</b> | Helical Pyrene-based Graphene Nanoribbon      |
| <b>CGNRH</b>   | Cove-edged Graphene Nanoribbon Heterojunction |
| <b>MGNR</b>    | Molecular Graphene Nanoribbon                 |

## 2. Abbreviations for characterization and computational methods

| <b>Abbreviation</b> | <b>Full name</b>                                                                 |
|---------------------|----------------------------------------------------------------------------------|
| <b>STM</b>          | Scanning Tunneling Microscopy                                                    |
| <b>nc-AFM</b>       | non-contact Atomic Force Microscopy                                              |
| <b>BR-STM</b>       | Bond-Resolved Scanning Tunneling Microscopy                                      |
| <b>STS</b>          | Scanning Tunneling Spectroscopy                                                  |
| <b>DFT</b>          | Density Functional Theory                                                        |
| <b>ARPES</b>        | Angle-Resolved Photoemission Spectroscopy                                        |
| <b>iDPC-STEM</b>    | integrated Differential Phase Contrast Scanning Transmission Electron Microscopy |
| <b>SPM</b>          | Scanning Probe Microscopy                                                        |
| <b>XPS</b>          | X-ray Photoelectron Spectroscopy                                                 |
| <b>FT-IR</b>        | Fourier Transform Infrared Spectroscopy                                          |
| <b>PL</b>           | Photoluminescence                                                                |
| <b>UV-Vis</b>       | Ultraviolet-Visible Spectroscopy                                                 |
| <b>UV-Vis-NIR</b>   | Ultraviolet-Visible-Near Infrared Spectroscopy                                   |
| <b>NMR</b>          | Nuclear Magnetic Resonance                                                       |
| <b>DQ-SQ NMR</b>    | Double-Quantum Single-Quantum Nuclear Magnetic Resonance                         |

| <b>Abbreviation</b> | <b>Full name</b>                      |
|---------------------|---------------------------------------|
| <b>GPC</b>          | Gel Permeation Chromatography         |
| <b>Raman</b>        | Raman Spectroscopy                    |
| <b>GW</b>           | GW approximation                      |
| <b>QM/MM</b>        | Quantum Mechanics/Molecular Mechanics |
| <b>FET</b>          | Field-Effect Transistor               |

### 3. Abbreviations for synthetic strategies and reactions

| <b>Abbreviation</b> | <b>Full name</b>                                |
|---------------------|-------------------------------------------------|
| <b>SCTP</b>         | Suzuki-Miyaura Catalyst-Transfer Polymerization |
| <b>PAIS</b>         | Protecting-group-assisted Iterative Synthesis   |
| <b>SMC</b>          | Suzuki-Miyaura Coupling                         |
| <b>MAD</b>          | Matrix-Assisted Direct Transfer                 |
| <b>CDHC</b>         | Cyclodehydrochlorination                        |

### 4. Abbreviations for electronic structure and physical parameters

| <b>Abbreviation</b> | <b>Full name</b>                    |
|---------------------|-------------------------------------|
| <b>CBM</b>          | Conduction Band Minimum             |
| <b>VBM</b>          | Valence Band Maximum                |
| <b>HOMO</b>         | Highest Occupied Molecular Orbital  |
| <b>LUMO</b>         | Lowest Unoccupied Molecular Orbital |
| <b>CBO</b>          | Conduction Band Offset              |

| <b>Abbreviation</b> | <b>Full name</b>            |
|---------------------|-----------------------------|
| <b>VBE</b>          | Valence Band Edge           |
| <b>CBE</b>          | Conduction Band Edge        |
| <b>DC</b>           | Direct Current              |
| <b>LDOS</b>         | Local Density of States     |
| <b>PDOS</b>         | Projected Density of States |
| <b>DOS</b>          | Density of States           |

### 5. Abbreviations for materials and compounds

| <b>Abbreviation</b> | <b>Full name</b>                          |
|---------------------|-------------------------------------------|
| <b>PDI</b>          | Perylene Diimide                          |
| <b>PEO</b>          | Poly(ethylene oxide)                      |
| <b>AHM</b>          | Anthracene-Hexadecylmaleimide             |
| <b>DDQ</b>          | 2,3-Dichloro-5,6-dicyano-1,4-benzoquinone |
| <b>TfOH</b>         | Trifluoromethanesulfonic Acid             |
| <b>THF</b>          | Tetrahydrofuran                           |
| <b>NMP</b>          | N-Methylpyrrolidone                       |
| <b>TCB</b>          | 1,2,4-Trichlorobenzene                    |
| <b>NMI</b>          | Naphthalene Monoimide                     |
| <b>PMI</b>          | Perylene Monoimide                        |
| <b>IF</b>           | Indenofluorene                            |

## 6. Others

| Abbreviation | Full name            |
|--------------|----------------------|
| UHV          | Ultra-High Vacuum    |
| THz          | Terahertz            |
| SSH          | Su-Schrieffer-Heeger |

## Chemical structures

| Abbreviation | Full name                                 | Structure                                                                             |
|--------------|-------------------------------------------|---------------------------------------------------------------------------------------|
| PDI          | Perylene Diimide                          | 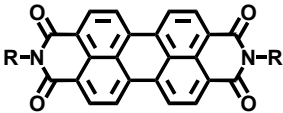  |
| PEO          | Poly(ethylene oxide)                      |  |
| AHM          | Anthracene-Hexadecylmaleimide             |  |
| DDQ          | 2,3-Dichloro-5,6-dicyano-1,4-benzoquinone |  |
| TfOH         | Trifluoromethanesulfonic Acid             |  |
| NMP          | N-Methylpyrrolidone                       |  |

| Abbreviation | Full name              | Structure                                                                           |
|--------------|------------------------|-------------------------------------------------------------------------------------|
| TCB          | 1,2,4-Trichlorobenzene | 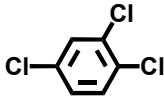 |
| NMI          | Naphthalene Monoimide  |  |
| PMI          | Perylene Monoimide     |  |
| IF           | Indenofluorene         |  |
